# Supplementary material
Source: PubMed Central journal article supplement (PMC7536644)
Supplement: mmc2.pdf [file mmc2.pdf]

# eQTL Colocalization Analyses Identify *NTN4* as a Candidate Breast Cancer Risk Gene

Jonathan Beesley,<sup>1,6,\*</sup> Haran Sivakumaran,<sup>1,6</sup> Mahdi Moradi Marjaneh,<sup>1,5,6</sup> Wei Shi,<sup>1</sup> Kristine M. Hillman,<sup>1</sup> Susanne Kaufmann,<sup>1</sup> Nehal Hussein,<sup>1,2</sup> Siddhartha Kar,<sup>3,4</sup> Luize G. Lima,<sup>1</sup> Sunyoung Ham,<sup>1</sup> Andreas Möller,<sup>1,2</sup> Georgia Chenevix-Trench,<sup>1,6</sup> Stacey L. Edwards,<sup>1,6,\*</sup> and Juliet D. French<sup>1,6</sup>

## Summary

Breast cancer genome-wide association studies (GWASs) have identified 150 genomic risk regions containing more than 13,000 credible causal variants (CCVs). The CCVs are predominantly noncoding and enriched in regulatory elements. However, the genes underlying breast cancer risk associations are largely unknown. Here, we used genetic colocalization analysis to identify loci at which gene expression could potentially explain breast cancer risk phenotypes. Using data from the Breast Cancer Association Consortium (BCAC) and quantitative trait loci (QTL) from the Genotype-Tissue Expression (GTEx) project and The Cancer Genome Project (TCGA), we identify shared genetic relationships and reveal novel associations between cancer phenotypes and effector genes. Seventeen genes, including *NTN4*, were identified as potential mediators of breast cancer risk. For *NTN4*, we showed the rs61938093 CCV at this region was located within an enhancer element that physically interacts with the *NTN4* promoter, and the risk allele reduced *NTN4* promoter activity. Furthermore, knockdown of *NTN4* in breast cells increased cell proliferation *in vitro* and tumor growth *in vivo*. These data provide evidence linking risk-associated variation to genes that may contribute to breast cancer predisposition.

The influence of common genetic variation on gene expression underlies a considerable proportion of the heritability associated with complex traits. Mapping of expression QTL (eQTL), where genetic variants are tested for association with gene expression levels, is widely used to identify genes that are regulated by trait-associated variants. Several studies have shown that eQTLs are enriched in cell types relevant to the trait of interest.<sup>1,2</sup> For example, T cell-specific eQTLs are over-represented for autoimmune risk alleles and monocyte-specific eQTLs for Alzheimer (MIM: 104300) and Parkinson (MIM: 168600) disease alleles.<sup>2</sup> For breast cancer (MIM: 114480), several studies have used eQTL data from tumor and normal tissues datasets to identify candidate target genes.<sup>3–6</sup> Recent studies have also showed that breast cancer risk variants could regulate genes in cells of the tumor microenvironment, such as immune cells and fibroblasts.<sup>7,8</sup> Because eQTLs are widespread, overlap between GWAS and eQTL signals is likely to occur by chance when using nominal significance levels. To mitigate false positive findings, it is therefore important to show that the same genetic signal underlies gene expression and disease susceptibility.

Several statistical colocalization approaches have been developed to determine whether molecular traits (e.g., gene expression) and a disease trait share common causal variants. The simplest Bayesian model used in tools such as QTLMatch<sup>9</sup> and COLOC<sup>10</sup> tests for colocalization for

two traits and determines whether they are driven by distinct variants or share a single causal signal. For example, Parker et al. used COLOC to identify 32 emphysema-associated (MIM: 130700) regions where it is likely that colocalized GWAS and eQTL signals arise from the same causal variant.<sup>11</sup> Additional functional studies then showed that the emphysema-associated variant rs1690789 regulates *TGFB2* (encoding transforming growth factor beta 2 [MIM: 190220]) expression in human lung fibroblasts. A recent implementation of COLOC, called HyPrColoc (Hypothesis Prioritization in multi-trait Colocalization), identifies colocalized association signals using summary statistics on large number of traits.<sup>12</sup> This method has been used to identify regulatory loci underlying quantitative hematopoietic traits.<sup>13</sup>

In this study, we extracted eQTL association effect estimates and standard errors for all variants at the 150 breast cancer risk loci previously analyzed by BCAC<sup>14</sup> (mean region size = 1.09 Mb). GWAS summary data were available for overall breast cancer risk from 122,977 case subjects and 105,974 control subjects;<sup>3</sup> and for estrogen receptor negative (ER–) breast cancer risk from 21,468 case subjects and 100,594 control subjects, combined with 18,908 *BRCA1* mutation carriers (9,414 with breast cancer),<sup>15</sup> all of European ancestries. Variant IDs were converted to GRCH38 build co-ordinates<sup>16</sup> and harmonized with GTEx data (0.86% failed conversion and were dropped

<sup>1</sup>Cancer Division, QIMR Berghofer Medical Research Institute, Brisbane, QLD 4029, Australia; <sup>2</sup>Faculty of Medicine, The University of Queensland, Brisbane, QLD 4006, Australia; <sup>3</sup>MRC Integrative Epidemiology Unit, University of Bristol, Bristol, UK; <sup>4</sup>Population Health Sciences, Bristol Medical School, University of Bristol, Bristol, UK

<sup>5</sup>Present address: UK Dementia Research Institute, Imperial College London, London W12 0BZ, UK

<sup>6</sup>These authors contributed equally to this work

\*Correspondence: [jonathan.beesley@qimrberghofer.edu.au](mailto:jonathan.beesley@qimrberghofer.edu.au) (J.B.), [stacey.edwards@qimrberghofer.edu.au](mailto:stacey.edwards@qimrberghofer.edu.au) (S.L.E.)

<https://doi.org/10.1016/j.ajhg.2020.08.006>

Crown Copyright © 2020

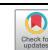

**Table 1. Candidate Breast Cancer Risk Genes Identified by eQTL Colocalization Analyses (PPFC > 0.7)**

| Ensembl ID         | Gene Name           | Breast Cancer Risk Association <sup>1</sup> | Genomic Coordinates (hg19) <sup>2</sup> | Posterior Probability <sup>3</sup> | Candidate SNP <sup>3</sup> | Posterior Explained by SNP <sup>3</sup> | GTEx eQTL p Value <sup>4</sup> | Breast Cancer Risk p Value <sup>1</sup> | Signal Type <sup>2</sup> |
|--------------------|---------------------|---------------------------------------------|-----------------------------------------|------------------------------------|----------------------------|-----------------------------------------|--------------------------------|-----------------------------------------|--------------------------|
| ENSG00000074527.11 | <i>NTN4</i>         | overall risk                                | chr12:95,527,759–96,527,759             | 0.9466                             | rs17356907                 | 0.97                                    | 8.01E–09                       | 1.02E–39                                | strong                   |
| ENSG00000141570.10 | <i>CBX8</i>         | overall risk                                | chr17:77,281,387–78,281,725             | 0.9178                             | rs9905914                  | 0.49                                    | 7.92E–23                       | 4.00E–09                                | strong                   |
| ENSG00000198945.7  | <i>L3MBTL3</i>      | overall risk                                | chr6:129,849,119–130,849,119            | 0.7998                             | rs7740107                  | 1.00                                    | 5.88E–40                       | 2.90E–11                                | strong                   |
| ENSG00000183654.8  | <i>MARCH11</i>      | overall risk                                | chr5:15,687,358–16,687,528              | 0.8369                             | rs1013018                  | 0.16                                    | 3.05E–09                       | 1.65E–11                                | strong                   |
| ENSG00000177595.17 | <i>PIDD1</i>        | overall risk                                | chr11:303,017–1,303,017                 | 0.9695                             | rs6597981                  | 0.22                                    | 6.53E–27                       | 1.35E–12                                | strong                   |
| ENSG00000166965.12 | <i>RCCD1</i>        | overall risk                                | chr15:91,009,215–92,009,215             | 0.9633                             | rs113343095                | 0.60                                    | 2.44E–24                       | 3.37E–15                                | strong                   |
| ENSG00000130511.15 | <i>SSBP4</i>        | overall risk                                | chr19:18,050,434–19,071,141             | 0.7800                             | rs7258465                  | 0.09                                    | 7.87E–08                       | 2.79E–28                                | strong                   |
| ENSG00000172748.13 | <i>ZNF596</i>       | ER– risk                                    | chr8:0–670,692                          | 0.9059                             | rs35346588                 | 0.79                                    | 2.17E–08                       | 1.39E–08                                | strong                   |
| ENSG00000258725.1  | <i>PRC1-AS1</i>     | overall risk                                | chr15:9,100,921–92,009,215              | 0.9302                             | rs2290202                  | 0.22                                    | 5.89E–10                       | 1.87E–15                                | strong                   |
| ENSG00000251141.5  | <i>RP11-53O19.1</i> | overall risk                                | chr5:44,013,304–45,206,498              | 0.9347                             | rs10941679                 | 1.00                                    | 4.41E–07                       | 5.61E–73                                | strong                   |
| ENSG00000272812.1  | <i>RP5-855D21.3</i> | ER– risk                                    | chr8:0–670692                           | 0.9769                             | rs3008281                  | 0.81                                    | 6.11E–08                       | 6.23E–09                                | strong                   |
| ENSG00000152348.15 | <i>ATG10</i>        | overall risk                                | chr5:80,928,261–82,038,046              | 0.7904                             | rs144580806                | 0.36                                    | 2.56E–40                       | 8.07E–12                                | moderate                 |
| ENSG00000015133.18 | <i>CCDC88C</i>      | overall risk                                | chr14:91,341,069–92,368,623             | 0.9465                             | rs8018155                  | 0.50                                    | 9.15E–11                       | 4.03E–12                                | moderate                 |
| ENSG00000163644.14 | <i>PPMIK</i>        | overall risk                                | chr4:88,743,818–89,743,818              | 0.9935                             | rs10022462                 | 0.58                                    | 1.60E–08                       | 1.55E–09                                | moderate                 |
| ENSG00000233967.6  | <i>RP11-250B2.3</i> | overall risk                                | chr6:80,594,287–81,594,287              | 0.8473                             | rs9448940                  | 0.22                                    | 4.65E–11                       | 9.85E–09                                | moderate                 |
| ENSG00000260645.1  | <i>RP11-250B2.5</i> | overall risk                                | chr6:80,594,287–81,594,287              | 0.8227                             | rs1436864                  | 0.08                                    | 1.97E–08                       | 3.89E–09                                | moderate                 |
| ENSG00000219392.1  | <i>RP1-265C24.5</i> | overall risk                                | chr6:26,180,698–27,180,698              | 0.9901                             | rs35768595                 | 0.38                                    | 5.95E–10                       | 3.16E–09                                | moderate                 |

<sup>1</sup>Michailidou et al.,<sup>3</sup> Milne et al.<sup>15</sup><sup>2</sup>Regions fine-mapped in Fachal et al.<sup>14</sup><sup>3</sup>Results from HyPrColoc. The “posterior explained by SNP” value represents the proportion of the posterior probability explained by the candidate SNP.<sup>4</sup>GTEx v.8 breast mammary tissue summary statistics.

from the analysis). The GTEx v.8 release includes data from normal breast tissue from 396 individuals. GTEx eQTL association data for variants within  $\pm 1$  Mb windows of transcription start sites were extracted based on the variants present in the breast cancer risk data. Colocalization of the GWAS and eQTL signals were calculated using the HyPrColoc R package.<sup>12</sup> Breast cancer risk phenotypes and each proximal gene were analyzed separately with default parameters. Signals were considered to be plausibly colocalizing if posterior probability for colocalization (PPFC) > 0.7.

We identified 17 genes at 14 loci where the GTEx eQTL association p values are <  $10^{-6}$  (Table 1). For every locus, all candidate SNPs met the GWAS significance p value

threshold ( $5 \times 10^{-8}$ ) for overall or ER– breast cancer risk (Table 1). For 11 loci (*NTN4* [MIM: 610401], *PIDD1* [MIM: 605247], *CBX8* [MIM: 617354], *L3MBTL3* [MIM: 618844], *RCCD1* [MIM: 617997], *PRC1-AS1*, *SSBP4* [MIM: 607391], *MARCH11* [MIM: 613338], *ZNF596*, *RP5-855D21.3*, and *RP11-53O19.1*), the candidate colocalized SNPs have been previously nominated as strong candidate causal signals using multivariate logistic regression<sup>14</sup> (Table 1 and Figure 1). However, at six loci (*ATG10* [MIM: 610800], *CCDC88C* [MIM: 611204], *PPMIK* [MIM: 611065], *RP11-250B2.3*, *RP1-265C24.5*, and *RP11-250B2.5*), the colocalization events are with moderate signals based on stepwise multinomial logistic regression analysis ( $10^{-6} < p < 10^{-4}$ ; Figure S1).<sup>14</sup> While this does not rule out causality, larger

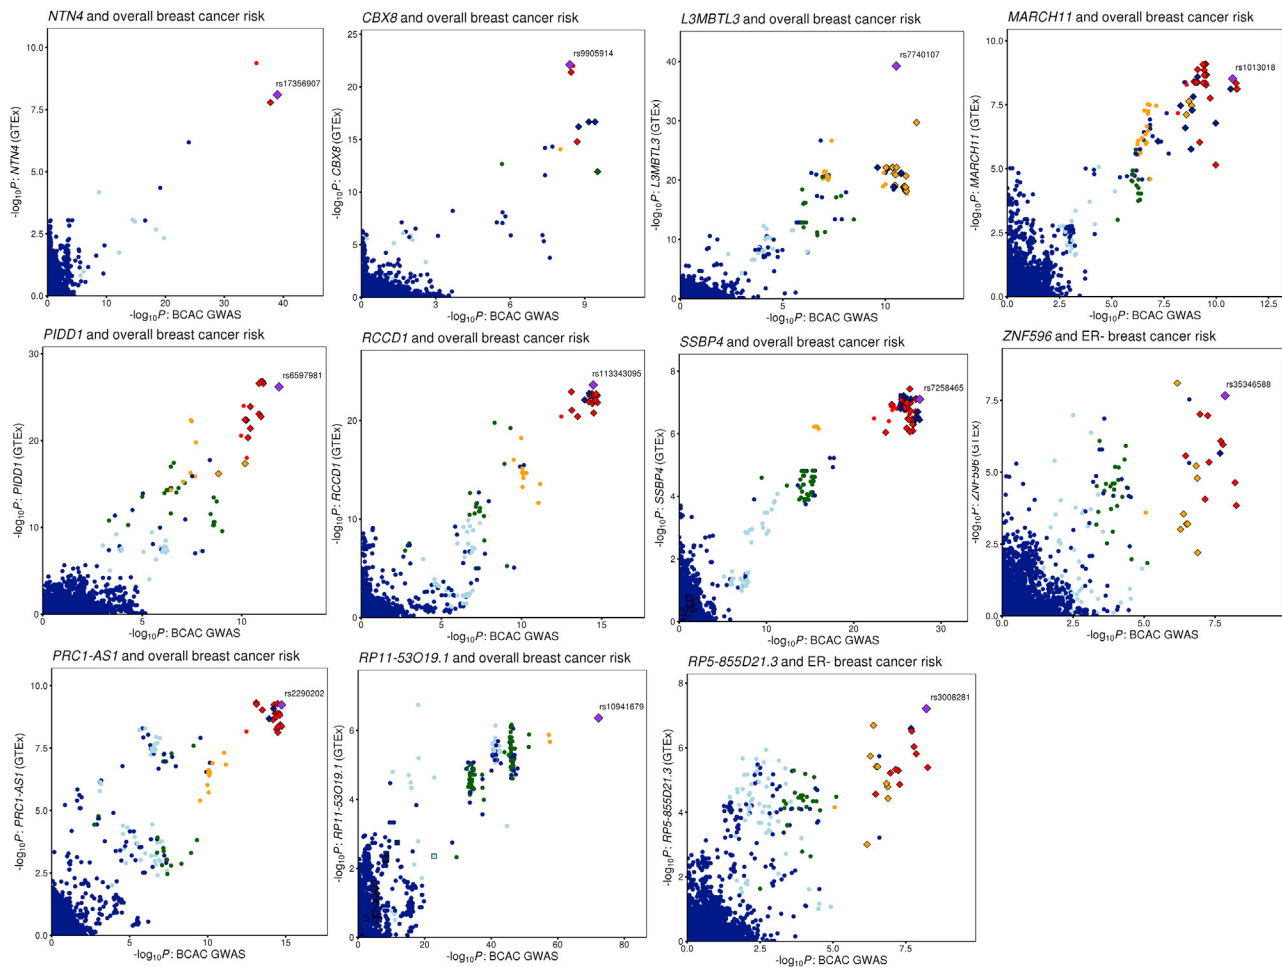

**Figure 1. Comparison of BCAC Strong Signals with GTEx v8 Breast Tissue eQTLs**  
 LocusCompare plots<sup>18</sup> for 11 high-probability colocalized signals. Gene names and the relevant breast cancer phenotypes are shown in the plot headings. Points are colored based on linkage disequilibrium (LD) bins relative to the candidate SNP prioritized by HyPrColoc (purple diamond labeled with rsID; red,  $\geq 0.8$ ; orange, 0.6–0.8; green, 0.4–0.6; light blue, 0.2–0.4; and dark blue,  $< 0.2$ ). LD data from 1000 Genomes phase 3, v.5 were retrieved from the LDlink portal.<sup>19</sup> Strong CCVs for breast cancer risk are annotated as small diamonds and moderate CCVs as squares.<sup>14</sup>

GWASs would be required to confirm genome-wide significance.<sup>14</sup> We also generated LocusCompare plots for colocalizing signals using the TCGA tumor dataset (Figure S2). Data were available for nine genes from a previous TCGA eQTL analysis.<sup>3,14</sup> Only two signals (*ATG10* and *RCCD1*) are indicative of colocalization in the TCGA tumor dataset (observing eQTL p values  $< 10^{-4}$ ; Figure S2). However, this is not unexpected since the regulatory landscape between normal tissue and tumors is vastly different.<sup>17</sup>

Published computational predictions of target genes at breast cancer risk loci using the INQUISIT pipeline (which interrogates data including ChIA-PET, Hi-C, ChIP-seq, and eQTL data independent of GTEx) provide further support for ten colocalized genes (Table S1).<sup>3,14</sup> Of these, *NTN4*, *PIDD1*, *L3MBTL3*, and *RCCD1* have the strongest evidence from functional genomics data. Transcriptome-wide association studies also suggest that 13 of the 17 genes are regulated by breast cancer risk variants<sup>5–7,20,21</sup> (Table S1). Moreover, previous eQTL analysis based on TCGA breast tumor

data have identified three of these candidate genes.<sup>3,14</sup> For three genes (*PIDD1*, *L3MBTL3*, and *SSBP4*), CCVs are located in the promoter regions, and for *PIDD1* previous reporter assays indicate that the risk haplotype increases promoter activity.<sup>3</sup> Our recent capture Hi-C data also showed that chromatin looping occurs between putative regulatory regions containing CCVs and the promoters of four genes (*NTN4*, *PRC1-AS1*, *ATG10*, and *RPI1-265C24.5*) in breast cell lines.<sup>22</sup> For the remaining loci, multiple CCVs were located in the introns of target genes and/or intergenic regions, but lacked demonstrable CCV-gene interactions. It is possible that some *cis*-regulatory interactions are detected only in specific breast cell subpopulations or that CCVs are acting through other mechanisms such as perturbation of pre-messenger RNA splicing or altered noncoding RNA stability, structure, and/or function. Of note, three genes (*PIDD1*, *CBX8*, and *L3MBTL3*) also contain breast cancer CCVs in their exons which are predicted to change the amino acid sequence,

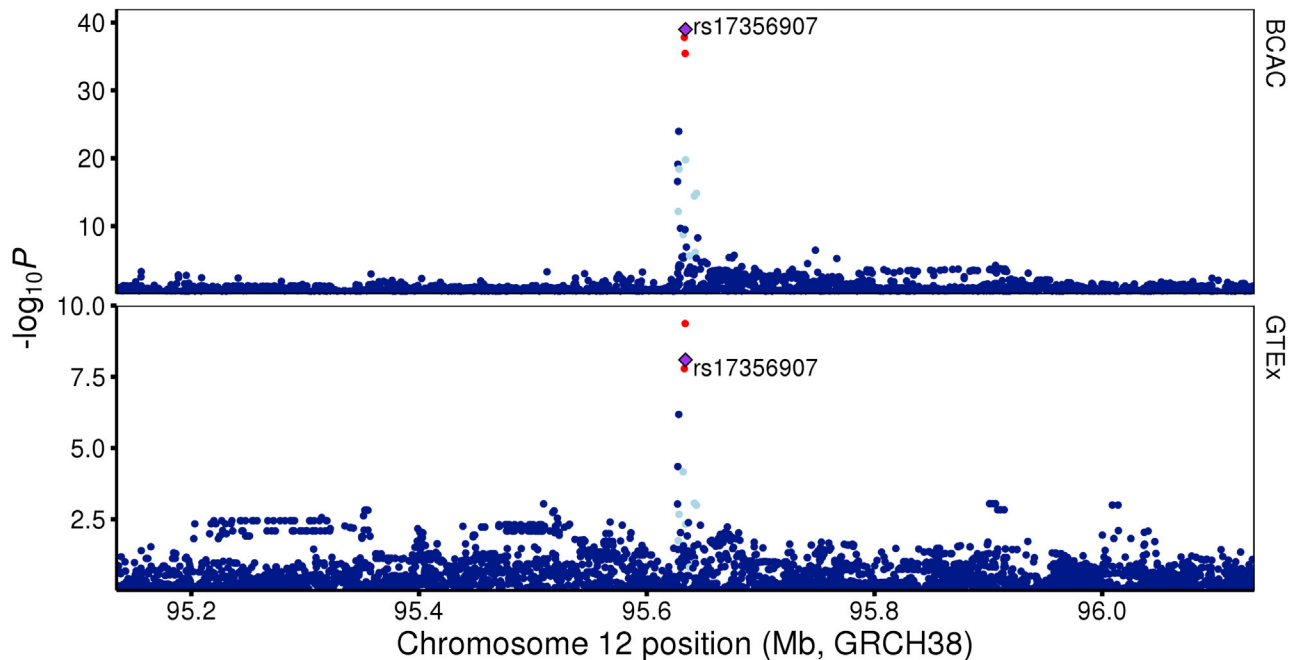

**Figure 2. Regional Association Plots at the 12q22 Breast Cancer Risk Locus**

Single variant associations with overall breast cancer risk (top) and with *NTN4* expression in normal breast tissue from GTEx v.8 (bottom). Variants are represented by points colored relative to linkage disequilibrium (LD) with the candidate variant detected by HyPrColoc (rs17356907; red,  $\geq 0.8$ ; orange, 0.6–0.8; green, 0.4–0.6; light blue, 0.2–0.4; and dark blue,  $< 0.2$ ).

thus we cannot rule out that these variants could also affect the protein product.

One high probability colocalization signal, associated with *NTN4* expression, was detected at a locus at 12q22 (Table 1, Figures 1 and 2). Genetic fine-mapping studies have identified one risk signal at 12q22 that contains two CCVs (rs61938093 and rs17356907; odds ratio = 1.094,  $r^2 = 1$ ).<sup>14</sup> Both CCVs fall within putative regulatory elements (PREs) marked by open chromatin in B80T5 and MCF10A non-tumorigenic breast cell lines (Figure 3A). The PREs map to a large intergenic region between *USP44* (MIM: 610993) (encoding ubiquitin-specific protease 44) and *NTN4* (encoding Netrin 4; Figure 3A). Using promoter capture HiC data,<sup>22</sup> we observed that the PREs frequently participate in long-range chromatin interactions with the *NTN4* promoter in non-tumorigenic and tumorigenic breast cell lines (Figures 3A and S3A). Notably, no other eQTLs or chromatin interactions from the PRE to promoter regions were detected in the breast cell lines we examined (Figures 3A and S3A),<sup>22</sup> suggesting that *NTN4* is the likely target gene at this signal.

To determine how the PRE alters *NTN4* transcriptional activity, we targeted a nuclease-defective dCas9 fused to the Kruppel-associated box (lentiviral vector pHR-SFFV-dCas9-BFP-KRAB; a gift from Stanley Qi and Jonathan Weissman, Addgene plasmid #46911) to the PRE. Two independent single-guide RNAs (sgRNAs) targeting the PRE were designed (Table S2) and cloned into the lentiviral vector pgRNA-humanized (a gift from Stanley Qi, Addgene plasmid #44248). Lentiviral particles were produced from

HEK293 cells transfected with accessory plasmids pCMV-dR8.91 and pCMV-VSV-G (gifts from David Harrich, QIMR Berghofer), and with dCas9-KRAB or pgRNA constructs using Lipofectamine 2000 (Life Technologies). Supernatants from dCas9-KRAB and pgRNA cultures were mixed and transduced into Bre80-TERT1 breast cells. Cells expressing both dCas9-KRAB (co-expressing blue fluorescent protein) and pgRNA (co-expressing mCherry) were enriched by FACS on the Aria IIIu platform (Becton Dickinson). Notably, silencing of the PRE significantly reduced *NTN4* expression in Bre80-TERT1 cells, suggesting that the PRE acts as a transcriptional enhancer (Figure 3B).

The regulatory capability of the PRE, combined with the effects of the CCVs, was further examined in reporter assays. An *NTN4* promoter-driven luciferase reporter construct was generated by the insertion of a PCR amplified genomic fragment into the KpnI/HindIII sites of pGL3-basic (Promega). A 1,010-base pairs (bp) fragment containing a PRE1, with the risk or protective alleles of rs61938093, or a 983-bp fragment containing a PRE2, with the risk or protective alleles of rs17356907, were synthesized as gBlocks (Integrated DNA Technologies) and cloned into the BamHI/SalI sites of the *NTN4*-promoter or pGL3-SV40 promoter construct (genomic coordinates and primers are listed in Table S2). MCF10A and Bre80-TERT1 breast cells were transfected with the reporter constructs and luciferase activity was measured 24 h post-transfection using the Dual-Glo Luciferase System (Promega). To correct for any differences in transfection efficiency, *Firefly* luciferase activity was normalized to

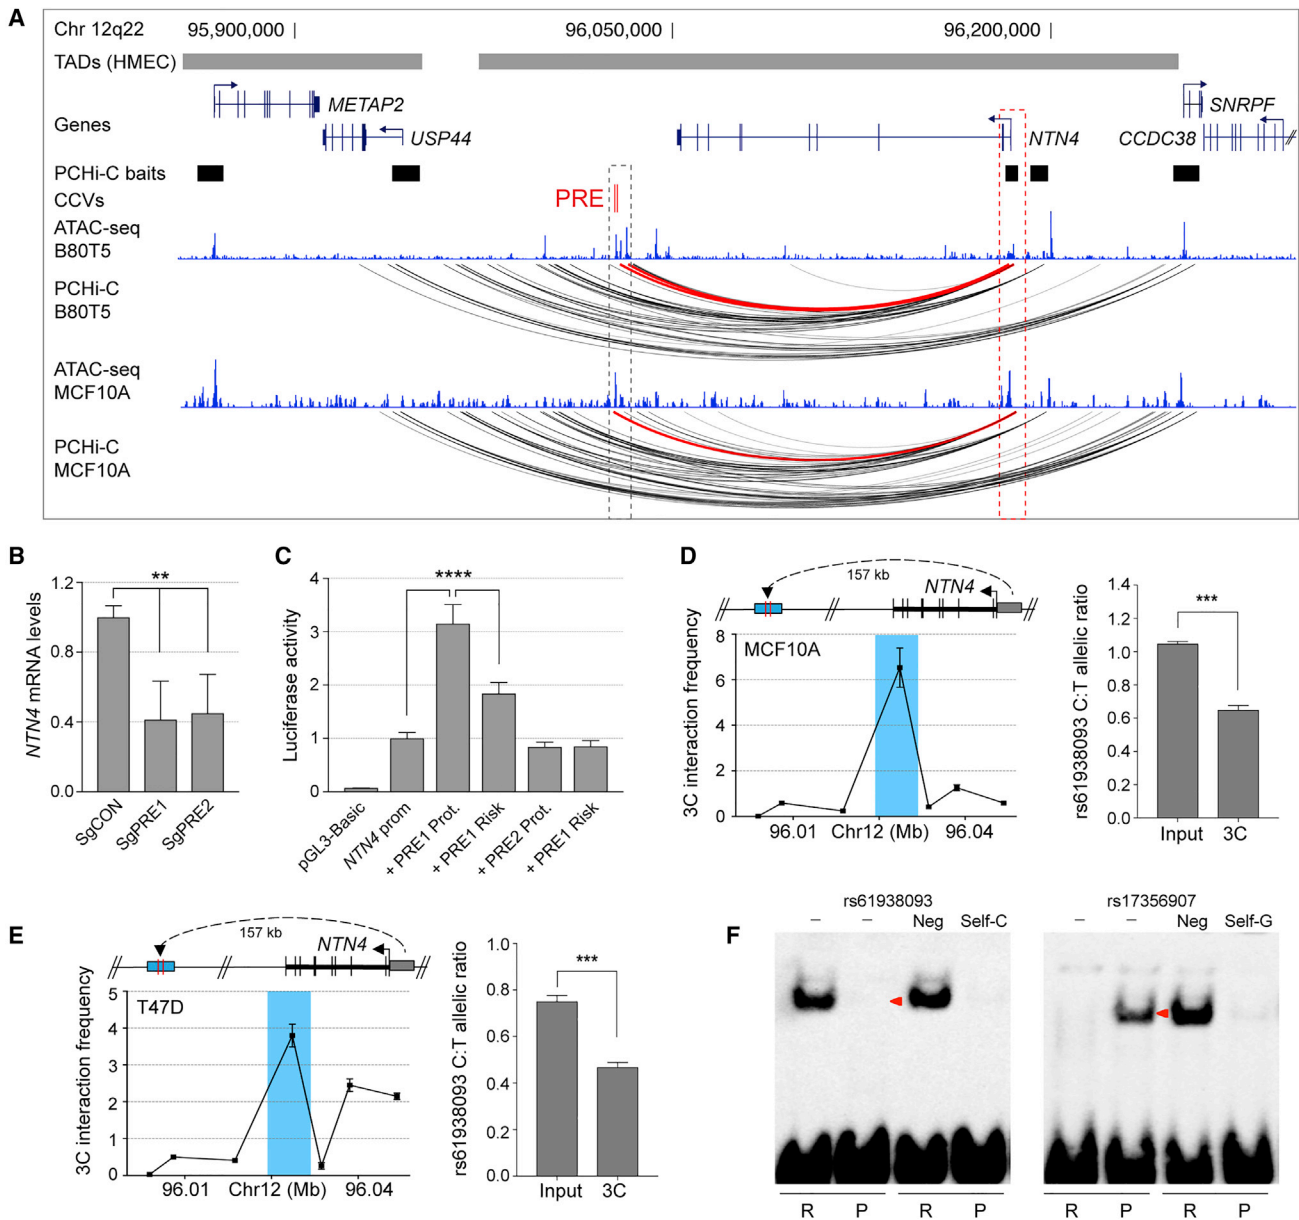

**Figure 3. Breast Cancer CCVs Distally Regulate *NTN4***

(A) WashU genome browser showing topologically associating domains (TADs) as horizontal gray bars above GENCODE-annotated coding genes (blue). The promoter capture Hi-C (PChi-C) baits are depicted as black boxes. The putative regulatory element (PRE) containing the CCVs is shown as red colored vertical lines. The ATAC-seq tracks for B80T5 and MCF10A breast cells are shown as blue histograms. PChi-C chromatin interactions are shown as black arcs. Red arcs depict chromatin looping between CCVs and the *NTN4* promoter region.

(B) dCAS9-KRAB was targeted to the PRE using two different sgRNAs (sgPRE1 and sgPRE2) in Bre80-TERT1 breast cells. SgCON contains a non-targeting control guide RNA. Gene expression was measured by qPCR and normalized to *beta-glucuronidase* (*GUSB*) expression. Error bars, SEM (n = 3). p values were determined by one-way ANOVA followed by Dunnett's multiple comparisons test (\*\*p < 0.01).

(C) Luciferase reporter assays following transient transfection of MCF10A breast cells. A PRE1 containing the protective (Prot.) or risk allele of rs61938093 and a PRE2 containing the protective (Prot.) or risk allele of rs1735907 were cloned into *NTN4*-promoter driven luciferase constructs. Error bars, SEM (n = 3). p values were determined by two-way ANOVA followed by Dunnett's multiple comparisons test (\*\*\*\*p < 0.0001).

(D and E) Left: 3C interaction profiles between the *NTN4* promoter and the genomic region containing the PRE in MCF10A (D) and T47D (E) 3C libraries generated with HindIII. A physical map of the region interrogated by 3C is shown above; the blue shading represents the position of the PRE and the anchor point set at the *NTN4* promoter. Representative 3C profiles are shown. Error bars, SD (n = 3). Right: Allele-specific qPCR using primer set 1 (Table S2) and Taqman SNP assay to quantify the allelic ratio at CCV rs61938093. Error bars, SEM (n = 3). p values were determined using a Student's t test (\*\*p < 0.001).

(F) EMSA for oligonucleotide duplexes containing CCVs rs61938093 or rs17356907 with the risk allele (R) or protective allele (P) as indicated, assayed using Bre80-TERT1 nuclear extracts. Competitor oligonucleotides are listed above each panel and were used at 100-fold molar excess: (-) no competitor; (Neg) a non-specific competitor; (Self) an identical oligonucleotide with no biotin label. Red arrowheads indicate band mobility differences between alleles.

*Renilla*. Reporter assays confirmed strong enhancer activity of the PRE1 on the *NTN4* promoter in MCF10A and Bre80-TERT1 cells and inclusion of the rs61938093 risk allele significantly reduced enhancer activity on the *NTN4* promoter (Figures 3C and S3B). In contrast, inclusion of PRE2 had no significant effect on the *NTN4* promoter activity in MCF10A but reduced *NTN4* promoter activity in Bre80-TERT1, suggesting it may act as a silencer element in these cells. Inclusion of the rs17356907 risk allele had no additional effects in either cell line (Figures 3C and S3B). Of note, PRE1 had no significant effect on the SV40 promoter activity, while PRE2 reduced its activity in MCF10A cells (Figure S3C). As reported previously,<sup>23</sup> the PRE1-*NTN4*-promoter specificity may indicate context-dependent regulation, but further studies will be needed to confirm this observation.

To assess the potential impact of the CCVs on chromatin looping, quantitative allele-specific 3C was performed in heterozygous MCF10A and T47D breast cell lines. 3C libraries were generated using HindIII as previously described.<sup>24</sup> 3C libraries (three biological replicates) or genomic input DNA from each cell line were amplified for 15 cycles with two sets of 3C-specific or genomic DNA PCR primers (listed in Table S2) and purified by QIAGEN columns. Bacterial artificial chromosome clones (RP11-282G15 and RP11-103I14) covering the 12q22 region were used to create artificial libraries of ligation products to normalize for PCR efficiency. Allele-specific PCR products were then quantified using a custom TaqMan SNP genotyping assay for rs61938093 (Life Technologies) on the Rotor-Gene 6000 platform. Purified PCR products were also Sanger sequenced by the Australian Genome Research Facility (AGRF). The results showed a preference for the protective *t*-allele (Figures 3D, 3E, S4A–S4D, and S5A–S5B), indicating that risk alleles could abrogate looping between the enhancer and *NTN4* promoter which in turn may reduce *NTN4* expression. As a negative control, we performed allele-specific 3C for rs7138694 which is heterozygous in MCF10A cells but located in a nearby HindIII fragment that did not interact with the *NTN4* promoter as strongly as the PRE1 (Figure S5C). Sequence profiles indicated no difference in allele peak heights between the 3C and gDNA inputs (Figure S5D), providing evidence that allelic imbalance is specific for the fragment containing PRE1.

Electrophoretic mobility shift assays (EMSAs) then assessed transcription factor (TF) binding for the protective and risk alleles of the CCVs. Nuclear lysates were prepared from Bre80-TERT1 and MCF10A breast cells using the NE-PER nuclear and cytoplasmic protein extraction kit (ThermoFisher). Biotinylated oligonucleotides representing the risk or protective allele were synthesized (Integrated DNA Technologies; Table S2) and annealed to form double-stranded duplexes. Duplex-bound complexes were resolved by electrophoresis in 10% (w/v) Tris-borate-EDTA polyacrylamide (Lonza) and transferred to positively charged nylon membranes by semi-dry transfer (Bio-Rad).

Membranes were processed using the LightShift Chemiluminescent EMSA kit (ThermoFisher) and visualized with the C-DiGit blot scanner. The EMSAs showed that rs61938093 and rs17356907 altered protein binding *in vitro* in Bre80-TERT1 and MCF10A cell lysates (Figures 3F, S6A, and S6B). *In silico* prediction tools including HaploReg<sup>25</sup> and Alibaba2<sup>26</sup> predicted both CCVs to alter TF binding. However, EMSAs using competitor DNA against predicted and other breast-relevant TFs were unable to identify the specific protein(s) binding to the alleles (Figures S6C and S6D).

We examined expression of *NTN4* in matched normal and cancerous breast tissues using TCGA RNA-seq data. *NTN4* was more highly expressed in normal tissue, a mixture of cell types, compared to adjacent tumor samples (Figure 4A), and is expressed across the histological subtypes, albeit with lower expression in the basal subtype (Figure 4B). To explore the effect of reduced *NTN4* on breast cancer cell proliferation, MCF7 cells were transfected with ON-TARGETplus negative control or *NTN4* siRNA smartpools (Dharmacon) using RNAiMAX (Life Technologies). *NTN4* silencing was confirmed by TaqMan qPCR gene expression assay 72 h post-transfection (Figures S6E and S6F). Notably, *NTN4* depletion promoted anchorage-dependent and -independent cell growth in MCF7 cells (Figures 4C and 4D). To assess the effect of reduced *NTN4* on tumor growth, we stably depleted *NTN4* in MCF7 cells by targeting dCAS9-KRAB to the promoter of *NTN4* and injected the cells in the mammary fat pad of nude mice. Female BALB/c-Foxn1<sup>nu</sup>/Arc mice were first subcutaneously implanted with 17 $\beta$ -estradiol (0.72 mg/pellet, 90 day release; Innovative Research of America) at 8 weeks of age. MCF7 control-CRISPRi or *NTN4*-CRISPRi cells were orthotopically injected into mammary fatpads 3 days later at 10<sup>7</sup> cells per mouse (6–7 mice per cell line). Tumor volumes were measured every 2 days until experimental end, at which point mice were euthanized and their tumors excised and weighed. All animal procedures were conducted in accordance with Australian National Health and Medical Research regulations on the use and care of experimental animals and approved by the QIMR Berghofer Medical Research Institute Animal Ethics Committee (P1499). Compared to control MCF7 cells containing non-targeting sgRNA, *NTN4* depletion led to a marked increase in tumor growth (Figures 4E, 4F, and S6G), which was reflected in increased tumor weight (Figure 4G).

*NTN4* encodes the Netrin-4 secreted protein which has been implicated in various developmental processes including axon guidance, angiogenesis, and mammary and lung morphogenesis.<sup>27</sup> Several studies show that *NTN4* is involved in cancer, but the exact role of *NTN4* appears to be dependent on the cancer type. For example, *NTN4* knockdown reduces cell proliferation and motility in gastric cancer (MIM: 613659) and melanoma (MIM: 155600)<sup>28,29</sup> but promotes cell migration and invasion in colorectal cancer (MIM: 114500) and breast cancer.<sup>30,31</sup>

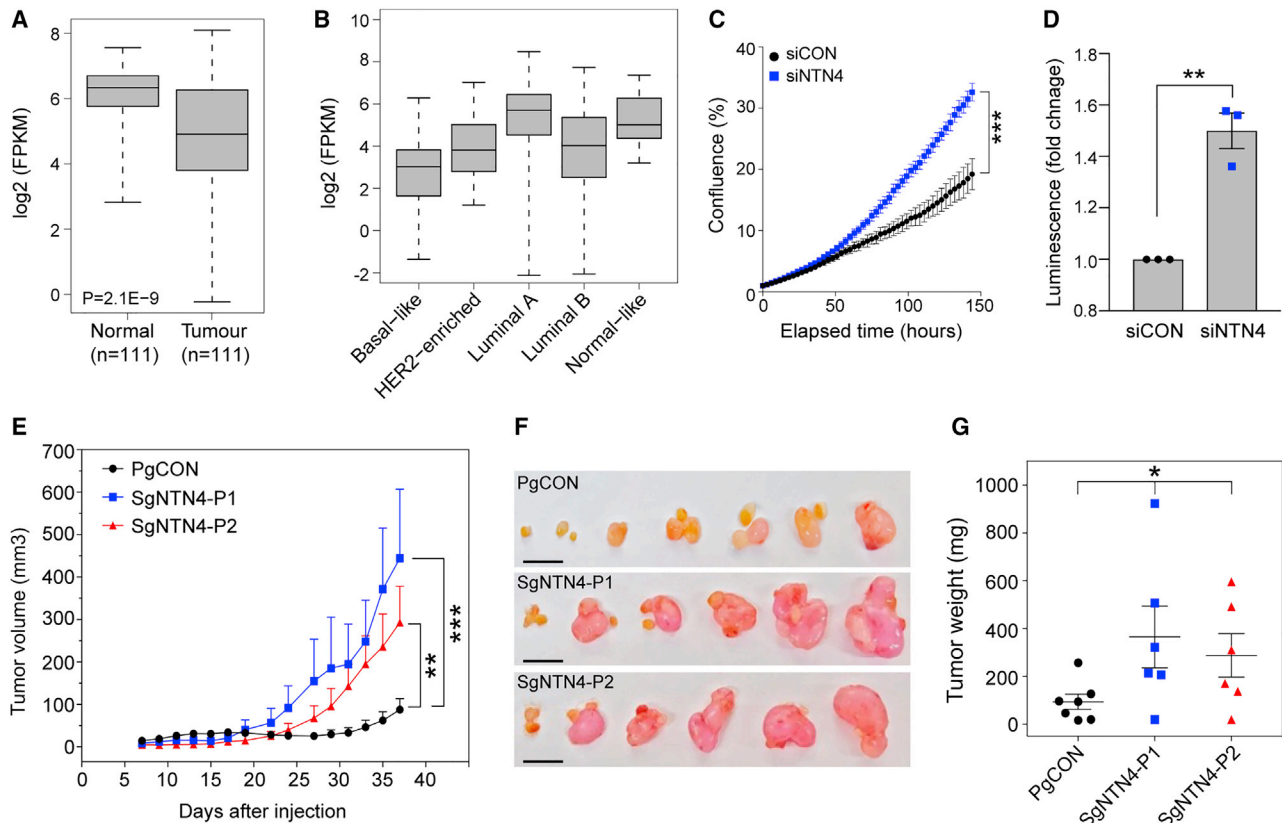

**Figure 4. NTN4 Depletion Promotes Breast Cell Proliferation and Tumor Formation**

(A) Boxplot showing *NTN4* expression in normal breast and paired tumor tissue samples from TCGA. Boxplots indicate median (center line), interquartile range (box limits), and range (whiskers). *p* value was determined using a two-tailed *t* test.

(B) Boxplot showing *NTN4* expression in breast tumors from TCGA stratified by PAM50 molecular subtypes (*n* = 841). Boxplots indicate median (center line), interquartile range (box limits), and range (whiskers).

(C) Proliferation of MCF7 cells transfected with a non-targeting control (siCON) or *NTN4* (siNTN4) ON-TARGETplus siRNAs. Cells were grown in 24-well plates and confluency of the wells was measured by the IncuCyte live-cell imaging system. Results represent relative cell growth rates. Error bars, SD (*n* = 2). *p* value was determined by Student's *t* test comparing confluency at the last time point measured (\*\*\**p* < 0.001).

(D) MCF7 cells were transfected with the siCON or siNTN4 and grown over 7 days in ultra low-attachment conditions. Cell growth was assessed using the CellTiter-Glo luminescent cell viability assay. Graph shows fold change in luminescence of siNTN4 treated cells relative to siCON treated cells. Error bar, SEM (*n* = 3). *p* value was determined by Student's *t* test (\*\**p* < 0.01).

(E) MCF7-control (PgCON) or MCF7-dCas9-KRAB *NTN4* repressed cells (SgNTN4-P1/P2) were orthotopically injected into the mammary fat pads of nude mice. Tumor growth curves for each group are shown. Values are shown as average tumor volumes at each time point. Error bars, SEM (*n* = 6–7 mice per group).

(F) Tumors of individual mice were dissected at day 38 post-injection. The scale bars represent 1 cm.

(G) Plot of the individual weights of tumors with mean and SEM shown by cross-bar and error bars.

Mann-Whitney *U* test (E and G) was used to compare differences between groups (\**p* < 0.05, \*\**p* < 0.01, \*\*\**p* < 0.001).

*NTN4* has also been implicated in breast cancer progression. For example, reduced *NTN4* is reported to promote migration and invasion of breast cancer cells through epithelial to mesenchymal transition.<sup>31</sup> In addition, *NTN4* has been shown to be an independent biomarker for prognosis of survival in breast cancer.<sup>32,33</sup> We and others have demonstrated that SNPs can alter chromatin loop formation between promoters and enhancers.<sup>34,35</sup> Here, we provide evidence that the same mechanism may explain how breast cancer CCVs alter *NTN4* expression and that suppressed *NTN4* increases cancer-related processes including cell proliferation and tumor growth. However, we acknowledge that further functional studies will be required to clarify how *NTN4* contributes to breast tumor development.

Seven additional colocalized target genes have prior evidence for a functional role in cancer. For example, PIDD1 (p53-induced death domain protein 1) is implicated in DNA-damage-induced apoptosis and tumorigenesis.<sup>36</sup> CBX8 is overexpressed in breast cancer and correlates with poor survival.<sup>37</sup> CBX8 functions by interacting with the H3K4 methyltransferase complex component WDR5 to activate genes involved in Notch signaling and promote breast tumorigenesis.<sup>37</sup> Furthermore, a recent study showed that ZNF596, a member of the zinc finger protein family, regulated the EZH2/STAT3 signaling pathway and promoted glioma stem-like cell renewal and tumorigenicity.<sup>38</sup> Notably, ten genes have no reported involvement in breast tumorigenesis and may represent new genes that influence the susceptibility to breast cancer. This list includes five

lncRNAs which are arguably more challenging to investigate as they can have multiple functions. However, there is increasing evidence that dysregulated lncRNAs contribute to breast cancer etiology.<sup>34,39,40</sup>

In summary, we used eQTL colocalization to link breast cancer risk variants to 17 target genes. We acknowledge that our colocalization analysis assumes a single causal variant, and thus further work will be required to identify colocalization where multiple independent signals exist within a genomic region. Our candidate risk genes include potential cancer drivers, but most have no reported role in breast cancer etiology. However, even with demonstration of shared genetic signals, it is as yet unknown how genes implicated by statistical colocalization analyses reflect true molecular mechanisms. It is therefore important to perform functional assays, as we have done for *NTN4*, to provide evidence that the gene plays a role in the disease etiology. Future work confirming the role of these genes or associated pathways in breast cancer development may ultimately lead to new avenues for breast cancer prevention or therapy.

### Data and Code Availability

The code generated during this study is available at [https://github.com/jmbeesley/BCcolocalisation\\_AJHG\\_2020](https://github.com/jmbeesley/BCcolocalisation_AJHG_2020).

### Supplemental Data

Supplemental Data can be found online at <https://doi.org/10.1016/j.ajhg.2020.08.006>.

### Acknowledgments

This work was supported by a grant from the National Health and Medical Research Council of Australia (NHMRC; 1120563). S.L.E. is an NHMRC Senior Research Fellow (1135932). G.C.T. is an NHMRC Senior Principal Research Fellow (1117073). J.D.F. was supported by a Fellowship from the National Breast Cancer Foundation of Australia. N.A. was co-funded by a QIMR Berghofer International PhD Scholarship and a University of Queensland Research Training Scholarship. The eQTL results published here are in part based upon data generated by TCGA Research Network. The breast cancer genome-wide association analyses were supported by the Government of Canada through Genome Canada and the Canadian Institutes of Health Research, the 'Ministère de l'Économie, de la Science et de l'Innovation du Québec' through Genome Québec and grant PSR-SIIRI-701, The National Institutes of Health (U19 CA148065, X01HG007492), Cancer Research UK (C1287/A10118, C1287/A16563, C1287/A10710), and The European Union (HEALTH-F2-2009-223175 and H2020 633784 and 634935). All studies and funders are listed in Michailidou et al.<sup>3</sup>

### Declaration of Interests

The authors declare no competing interests.

Received: April 29, 2020

Accepted: August 10, 2020

Published: August 31, 2020

### Web Resources

Bioconductor, <https://www.bioconductor.org/>

Breast Cancer Association Consortium, <http://bcac.ccge.medschl.cam.ac.uk/bcacdata/oncoarray/oncoarray-and-combined-summary-result/gwas-summary-results-breast-cancer-risk-2017/>

GTEx Portal, <https://gtexportal.org/home/>

LDlink, <https://ldlink.nci.nih.gov/>

OMIM, <https://www.omim.org/>

### References

1. Ongen, H., Brown, A.A., Delaneau, O., Panousis, N.I., Nica, A.C., Dermitzakis, E.T.; and GTEx Consortium (2017). Estimating the causal tissues for complex traits and diseases. *Nat. Genet.* **49**, 1676–1683.
2. Raj, T., Rothamel, K., Mostafavi, S., Ye, C., Lee, M.N., Replogle, J.M., Feng, T., Lee, M., Asinovski, N., Frohlich, I., et al. (2014). Polarization of the effects of autoimmune and neurodegenerative risk alleles in leukocytes. *Science* **344**, 519–523.
3. Michailidou, K., Lindström, S., Dennis, J., Beesley, J., Hui, S., Kar, S., Lemaçon, A., Soucy, P., Glubb, D., Rostamianfar, A., et al.; NBCS Collaborators; ABCTB Investigators; and ConFab/AOCS Investigators (2017). Association analysis identifies 65 new breast cancer risk loci. *Nature* **551**, 92–94.
4. Li, Q., Seo, J.H., Stranger, B., McKenna, A., Pe'er, I., Laframboise, T., Brown, M., Tyekucheva, S., and Freedman, M.L. (2013). Integrative eQTL-based analyses reveal the biology of breast cancer risk loci. *Cell* **152**, 633–641.
5. Guo, X., Lin, W., Bao, J., Cai, Q., Pan, X., Bai, M., Yuan, Y., Shi, J., Sun, Y., Han, M.R., et al. (2018). A comprehensive cis-eQTL Analysis revealed target genes in breast cancer susceptibility loci identified in genome-wide association studies. *Am. J. Hum. Genet.* **102**, 890–903.
6. Wu, L., Shi, W., Long, J., Guo, X., Michailidou, K., Beesley, J., Bolla, M.K., Shu, X.O., Lu, Y., Cai, Q., et al.; NBCS Collaborators; and kConFab/AOCS Investigators (2018). A transcriptome-wide association study of 229,000 women identifies new candidate susceptibility genes for breast cancer. *Nat. Genet.* **50**, 968–978.
7. Ferreira, M.A., Gamazon, E.R., Al-Ejeh, F., Aittomäki, K., Andrulis, I.L., Anton-Culver, H., Arason, A., Arndt, V., Aronson, K.J., Arun, B.K., et al.; EMBRACE Collaborators; GC-HBOC Study Collaborators; GEMO Study Collaborators; ABCTB Investigators; HEBON Investigators; and BCFR Investigators (2019). Genome-wide association and transcriptome studies identify target genes and risk loci for breast cancer. *Nat. Commun.* **10**, 1741.
8. Geeleher, P., Nath, A., Wang, F., Zhang, Z., Barbeira, A.N., Fessler, J., Grossman, R.L., Seoighe, C., and Stephanie Huang, R. (2018). Cancer expression quantitative trait loci (eQTLs) can be determined from heterogeneous tumor gene expression data by modeling variation in tumor purity. *Genome Biol.* **19**, 130.
9. Plagnol, V., Smyth, D.J., Todd, J.A., and Clayton, D.G. (2009). Statistical independence of the colocalized association signals for type 1 diabetes and RPS26 gene expression on chromosome 12q13. *Biostatistics* **10**, 327–334.
10. Giambartolomei, C., Vukcevic, D., Schadt, E.E., Franke, L., Hingorani, A.D., Wallace, C., and Plagnol, V. (2014). Bayesian test for colocalisation between pairs of genetic association studies using summary statistics. *PLoS Genet.* **10**, e1004383.



11. Parker, M.M., Hao, Y., Guo, F., Pham, B., Chase, R., Platig, J., Cho, M.H., Hersh, C.P., Thannickal, V.J., Crapo, J., et al. (2019). Identification of an emphysema-associated genetic variant near *TGF $\beta$ 2* with regulatory effects in lung fibroblasts. *eLife* 8, 8.
12. Foley, C.N., Staley, J.R., Breen, P.G., Sun, B.B., Kirk, P.D.W., Burgess, S., and Howson, J.M.M. (2019). A fast and efficient colocalization algorithm for identifying shared genetic risk factors across multiple traits. *bioRxiv*. <https://doi.org/10.1101/592238>.
13. Thom, C.S., and Voight, B.F. (2020). Genetic colocalization atlas points to common regulatory sites and genes for hematopoietic traits and hematopoietic contributions to disease phenotypes. *BMC Med. Genomics* 13, 89.
14. Fachal, L., Aschard, H., Beesley, J., Barnes, D.R., Allen, J., Kar, S., Pooley, K.A., Dennis, J., Michailidou, K., Turman, C., et al.; GEMO Study Collaborators; EMBRACE Collaborators; KConFab Investigators; HEBON Investigators; and ABCTB Investigators (2020). Fine-mapping of 150 breast cancer risk regions identifies 191 likely target genes. *Nat. Genet.* 52, 56–73.
15. Milne, R.L., Kuchenbaecker, K.B., Michailidou, K., Beesley, J., Kar, S., Lindström, S., Hui, S., Lemaçon, A., Soucy, P., Dennis, J., et al.; ABCTB Investigators; EMBRACE; GEMO Study Collaborators; HEBON; kConFab/AOCS Investigators; and NBSC Collaborators (2017). Identification of ten variants associated with risk of estrogen-receptor-negative breast cancer. *Nat. Genet.* 49, 1767–1778.
16. Pärn, K., Nunez Fontarnau, J., Isokallio, M.A., Sipilä, T., Kilpeläinen, E., Palotie, A., Ripatti, S., and Palta, P. (2019). Genotyping chip data lift-over to reference genome build GRCh38/hg38. *Protocols.io*. <https://doi.org/10.17504/protocols.io.xbhñj6>.
17. Thurman, R.E., Rynes, E., Humbert, R., Vierstra, J., Maurano, M.T., Haugen, E., Sheffield, N.C., Stergachis, A.B., Wang, H., Vernot, B., et al. (2012). The accessible chromatin landscape of the human genome. *Nature* 489, 75–82.
18. Liu, B., Gloude-mans, M.J., Rao, A.S., Ingelsson, E., and Montgomery, S.B. (2019). Abundant associations with gene expression complicate GWAS follow-up. *Nat. Genet.* 51, 768–769.
19. Machiela, M.J., and Chanock, S.J. (2015). LDlink: a web-based application for exploring population-specific haplotype structure and linking correlated alleles of possible functional variants. *Bioinformatics* 31, 3555–3557.
20. Barfield, R., Feng, H., Gusev, A., Wu, L., Zheng, W., Pasaniuc, B., and Kraft, P. (2018). Transcriptome-wide association studies accounting for colocalization using Egger regression. *Genet. Epidemiol.* 42, 418–433.
21. Feng, H., Gusev, A., Pasaniuc, B., Wu, L., Long, J., Abu-Full, Z., Aittomäki, K., Andrulis, I.L., Anton-Culver, H., Antoniou, A.C., et al.; GEMO Study Collaborators; EMBRACE Collaborators; GC-HBOC study Collaborators; ABCTB Investigators; HEBON Investigators; BCFR Investigators; and OCGN Investigators (2020). Transcriptome-wide association study of breast cancer risk by estrogen-receptor status. *Genet. Epidemiol.* 44, 442–468.
22. Beesley, J., Sivakumaran, H., Moradi Marjaneh, M., Lima, L.G., Hillman, K.M., Kaufmann, S., Tuano, N., Hussein, N., Ham, S., Mukhopadhyay, P., et al. (2020). Chromatin interactome mapping at 139 independent breast cancer risk signals. *Genome Biol.* 21, 8.
23. Zabidi, M.A., Arnold, C.D., Schernhuber, K., Pagani, M., Rath, M., Frank, O., and Stark, A. (2015). Enhancer-core-promoter specificity separates developmental and housekeeping gene regulation. *Nature* 518, 556–559.
24. Ghossaini, M., Edwards, S.L., Michailidou, K., Nord, S., Cowper-Sal Lari, R., Desai, K., Kar, S., Hillman, K.M., Kaufmann, S., Glubb, D.M., et al.; Australian Ovarian Cancer Management Group; and Australian Ovarian Cancer Management Group (2014). Evidence that breast cancer risk at the 2q35 locus is mediated through IGFBP5 regulation. *Nat. Commun.* 4, 4999.
25. Ward, L.D., and Kellis, M. (2016). HaploReg v4: systematic mining of putative causal variants, cell types, regulators and target genes for human complex traits and disease. *Nucleic Acids Res.* 44 (D1), D877–D881.
26. Grabe, N. (2002). AliBaba2: context specific identification of transcription factor binding sites. *In Silico Biol. (Gedruckt)* 2, S1–S15.
27. Wilson, B.D., Ii, M., Park, K.W., Suli, A., Sorensen, L.K., Larrieu-Lahargue, F., Urness, L.D., Suh, W., Asai, J., Kock, G.A., et al. (2006). Netrins promote developmental and therapeutic angiogenesis. *Science* 313, 640–644.
28. Lv, B., Song, C., Wu, L., Zhang, Q., Hou, D., Chen, P., Yu, S., Wang, Z., Chu, Y., Zhang, J., et al. (2015). Netrin-4 as a biomarker promotes cell proliferation and invasion in gastric cancer. *Oncotarget* 6, 9794–9806.
29. Jayachandran, A., Prithviraj, P., Lo, P.H., Walkiewicz, M., Anaka, M., Woods, B.L., Tan, B., Behren, A., Cebon, J., and McKeown, S.J. (2016). Identifying and targeting determinants of melanoma cellular invasion. *Oncotarget* 7, 41186–41202.
30. Eveno, C., Broqueres-You, D., Feron, J.G., Rampanou, A., Tijeras-Raballand, A., Ropert, S., Leconte, L., Levy, B.I., and Pocard, M. (2011). Netrin-4 delays colorectal cancer carcinomatosis by inhibiting tumor angiogenesis. *Am. J. Pathol.* 178, 1861–1869.
31. Xu, X., Yan, Q., Wang, Y., and Dong, X. (2017). NTN4 is associated with breast cancer metastasis via regulation of EMT-related biomarkers. *Oncol. Rep.* 37, 449–457.
32. Essegir, S., Reis-Filho, J.S., Kennedy, A., James, M., O'Hare, M.J., Jeffery, R., Poulson, R., and Isacke, C.M. (2006). Identification of transmembrane proteins as potential prognostic markers and therapeutic targets in breast cancer by a screen for signal sequence encoding transcripts. *J. Pathol.* 210, 420–430.
33. Essegir, S., Kennedy, A., Seedhar, P., Nerurkar, A., Poulson, R., Reis-Filho, J.S., and Isacke, C.M. (2007). Identification of NTN4, TRA1, and STC2 as prognostic markers in breast cancer in a screen for signal sequence encoding proteins. *Clin. Cancer Res.* 13, 3164–3173.
34. Betts, J.A., Moradi Marjaneh, M., Al-Ejeh, F., Lim, Y.C., Shi, W., Sivakumaran, H., Tropée, R., Patch, A.M., Clark, M.B., Bartoniczek, N., et al. (2017). Long noncoding RNAs CUPID1 and CUPID2 mediate breast cancer risk at 11q13 by modulating the response to DNA damage. *Am. J. Hum. Genet.* 101, 255–266.
35. Visser, M., Kayser, M., and Palstra, R.J. (2012). HERC2 rs12913832 modulates human pigmentation by attenuating chromatin-loop formation between a long-range enhancer and the OCA2 promoter. *Genome Res.* 22, 446–455.
36. Lin, Y., Ma, W., and Benchimol, S. (2000). Pidd, a new death-domain-containing protein, is induced by p53 and promotes apoptosis. *Nat. Genet.* 26, 122–127.
37. Chung, C.Y., Sun, Z., Mullokandov, G., Bosch, A., Qadeer, Z.A., Cihan, E., Rapp, Z., Parsons, R., Aguirre-Ghiso, J.A., Farias, E.F., et al. (2016). Cbx8 Acts Non-canonically with Wdr5 to Promote Mammary Tumorigenesis. *Cell Rep.* 16, 472–486.

38. Tang, J., Yu, B., Li, Y., Zhang, W., Alvarez, A.A., Hu, B., Cheng, S.Y., and Feng, H. (2019). TGF- $\beta$ -activated lncRNA LINC00115 is a critical regulator of glioma stem-like cell tumorigenicity. *EMBO Rep.* *20*, e48170.
39. Moradi Marjaneh, M., Beesley, J., O'Mara, T.A., Mukhopadhyay, P., Koufariotis, L.T., Kazakoff, S., Hussein, N., Fachal, L., Bartonicek, N., Hillman, K.M., et al. (2020). Non-coding RNAs underlie genetic predisposition to breast cancer. *Genome Biol.* *21*, 7.
40. Xu, S., Kong, D., Chen, Q., Ping, Y., and Pang, D. (2017). Oncogenic long noncoding RNA landscape in breast cancer. *Mol. Cancer* *16*, 129.

The American Journal of Human Genetics, Volume 107

## Supplemental Data

### **eQTL Colocalization Analyses Identify *NTN4* as a Candidate Breast Cancer Risk Gene**

**Jonathan Beesley, Haran Sivakumaran, Mahdi Moradi Marjaneh, Wei Shi, Kristine M. Hillman, Susanne Kaufmann, Nehal Hussein, Siddhartha Kar, Luize G. Lima, Sunyoung Ham, Andreas Möller, Georgia Chenevix-Trench, Stacey L. Edwards, and Juliet D. French**

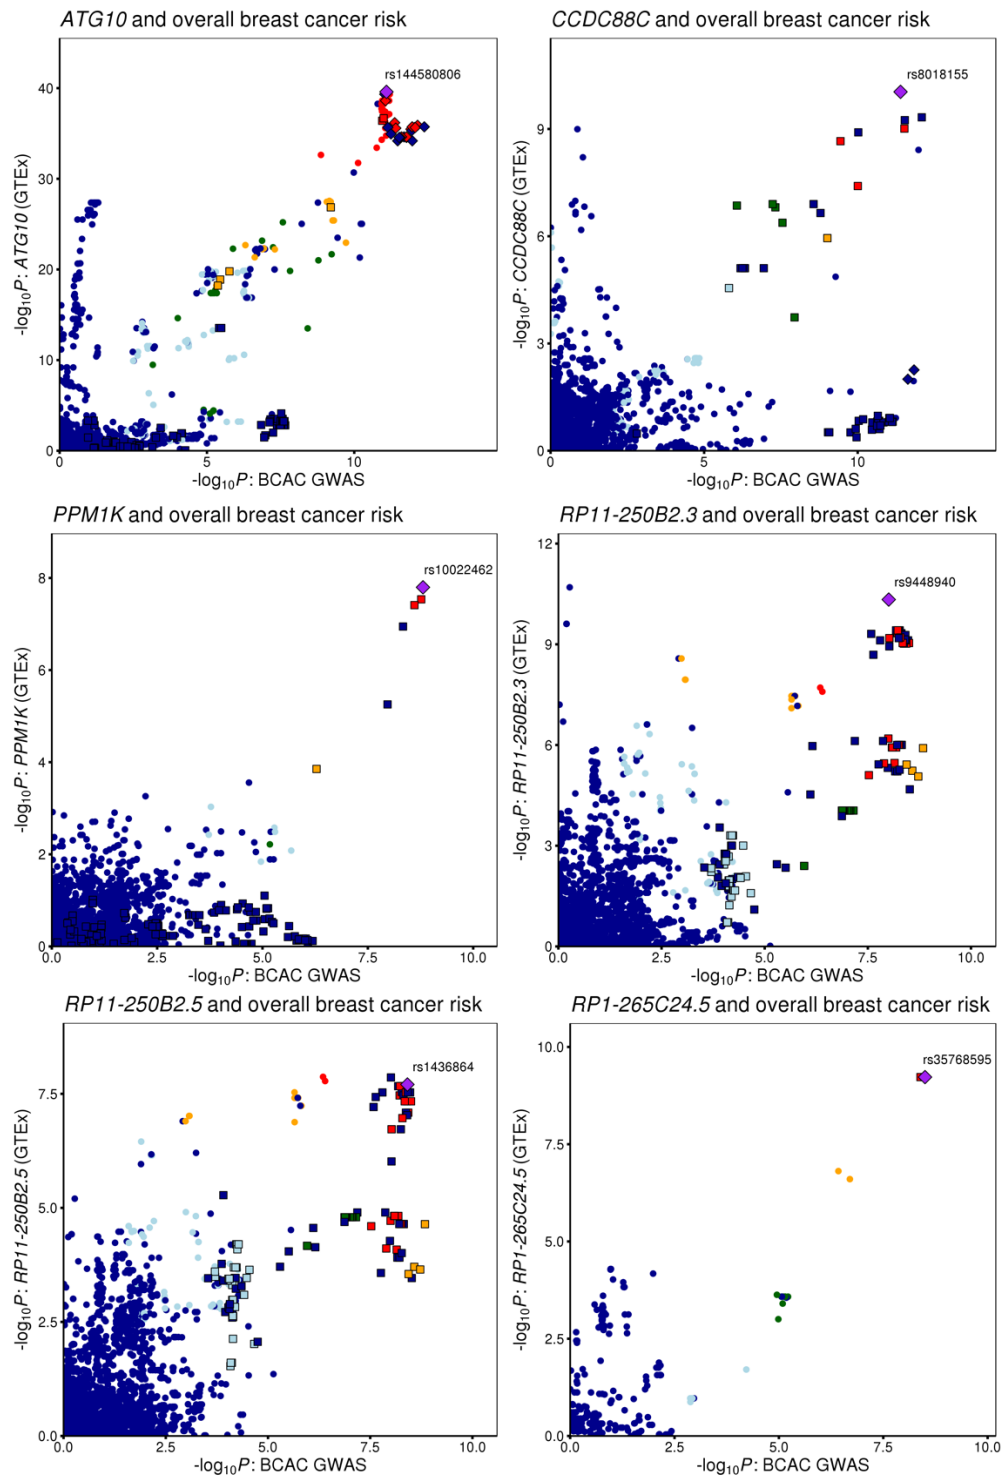

**Figure S1. Comparison of BCAC moderate signals with GTEx v8 breast tissue eQTLs.** LocusCompare plots<sup>39</sup> for six colocalized signals. Gene names and the relevant breast cancer phenotypes are shown in the plot headings. Points are coloured based on linkage disequilibrium (LD) bins relative to the candidate SNP prioritized by HyPrColoc (purple diamond labeled with rsID; red:  $\geq 0.8$ , orange: 0.6–0.8, green: 0.4–0.6, light blue: 0.2–0.4, and dark blue:  $< 0.2$ ). LD data from 1000 Genomes phase 3, version 5 were retrieved from the LDlink portal<sup>40</sup>. Strong CCVs for breast cancer risk are annotated as small diamonds and moderate CCVs as squares<sup>14</sup>.

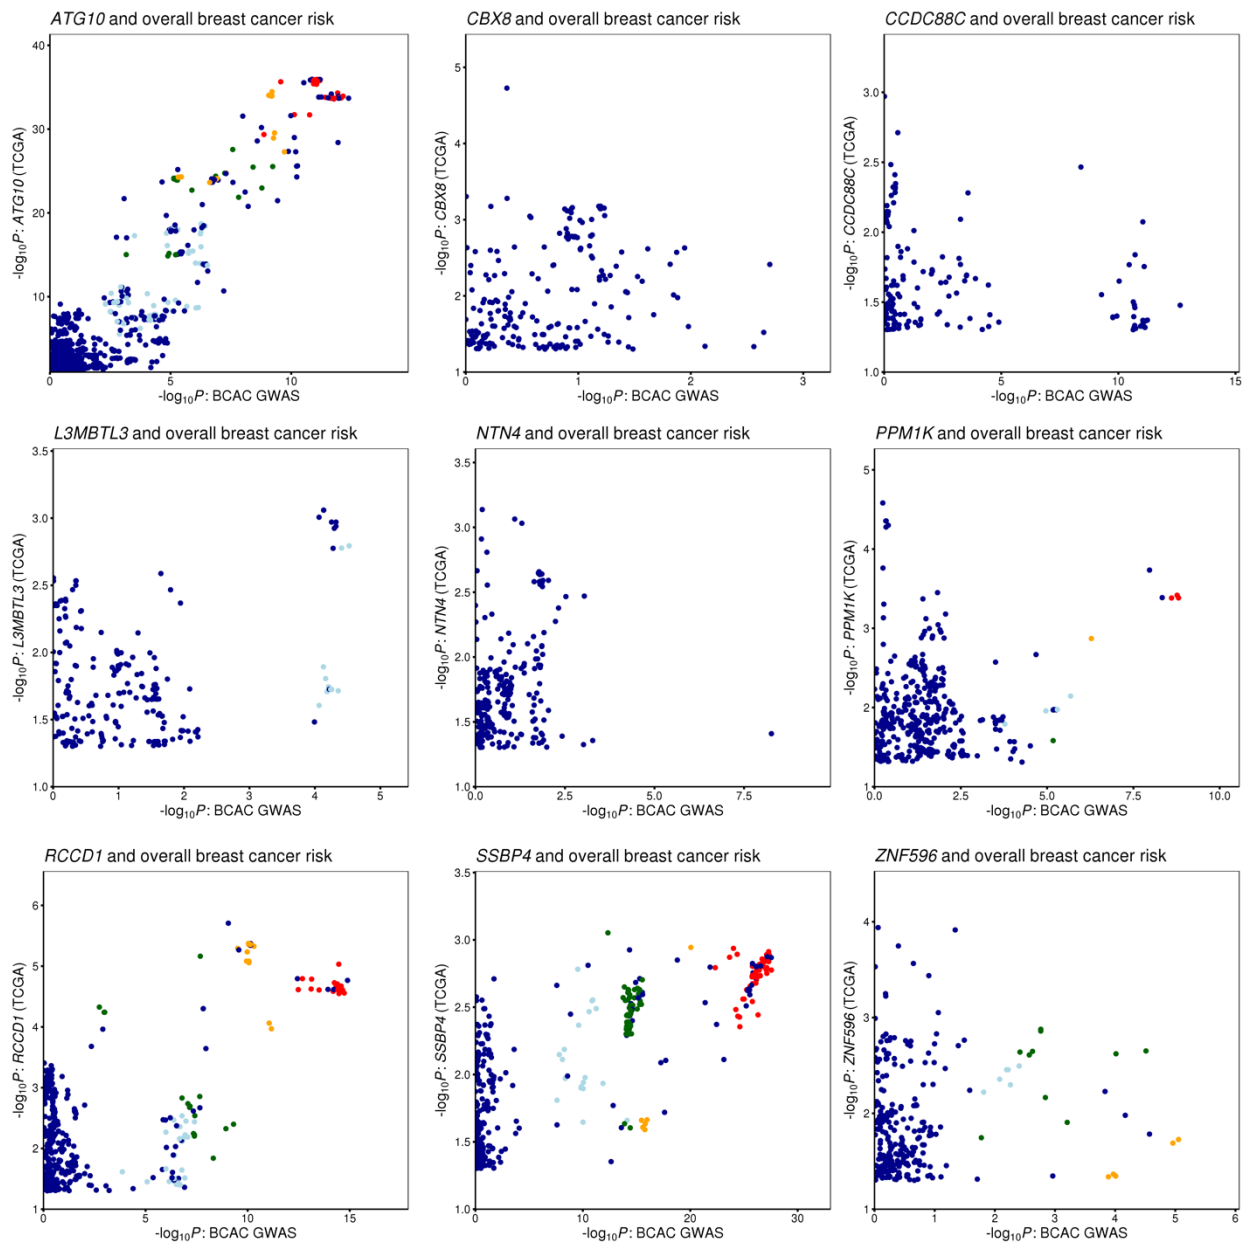

**Figure S2. Comparison of BCAC signals with TCGA breast tumor tissue eQTLs.** LocusCompare plots<sup>39</sup> for nine signals. Gene names and the relevant breast cancer phenotypes are shown in the plot headings. Points are coloured based on linkage disequilibrium (LD) bins relative to the candidate SNP prioritized by HyPrColoc (purple diamond labeled with rsID; red:  $\geq 0.8$ , orange: 0.6–0.8, green: 0.4–0.6, light blue: 0.2–0.4, and dark blue:  $< 0.2$ ). LD data from 1000 Genomes phase 3, version 5 were retrieved from the LDlink portal<sup>40</sup>.

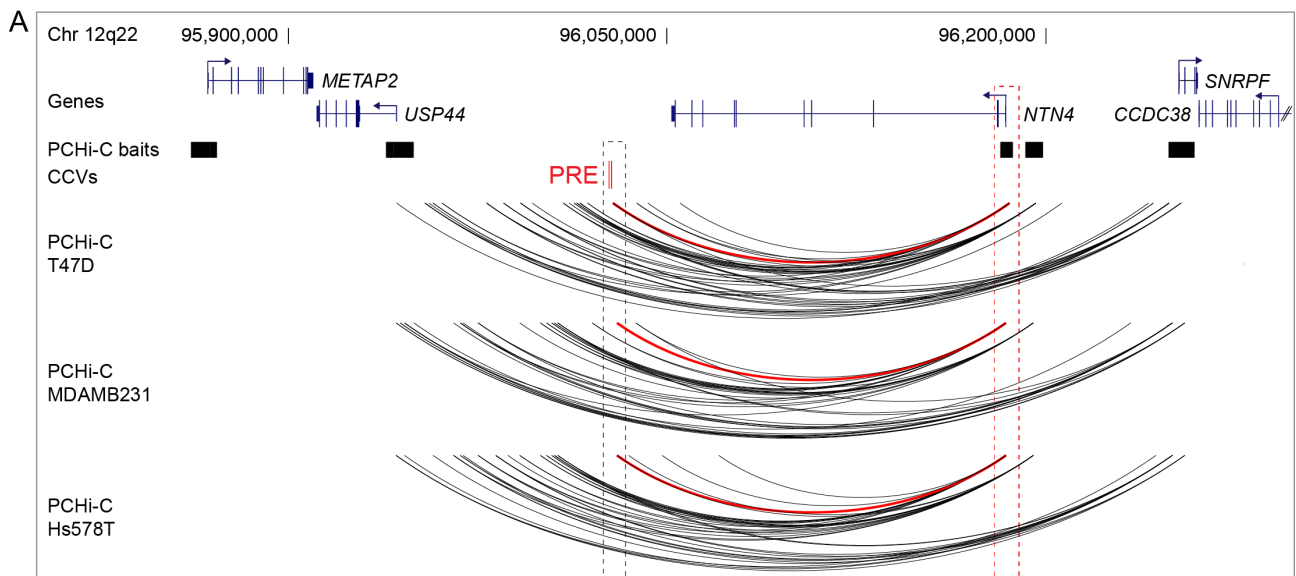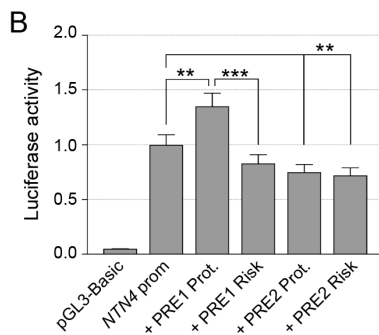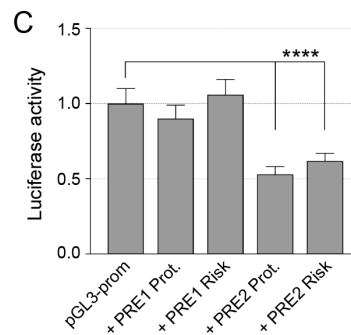

**Figure S3. Capture HiC and reporter assays. (A)** WashU genome browser showing GENCODE annotated coding genes (blue). The promoter capture Hi-C (PCHi-C) baits are depicted as black boxes. The putative regulatory element (PRE) containing the CCVs is shown as red colored vertical lines. PCHi-C chromatin interactions are shown as black arcs. Red arcs depict chromatin looping between CCVs and the *NTN4* promoter region. **(B)** Luciferase reporter assays following transient transfection of Bre80-hTERT1 breast cells. A PRE1 containing the protective (Prot.) or risk allele of rs61938093 and a PRE2 containing the protective (Prot.) or risk allele of rs1735907 were cloned into *NTN4*-promoter driven luciferase constructs. Error bars, SEM (n=3). *P*-values were determined by two-way ANOVA followed by Dunnett's multiple comparisons test (\*\**p* < 0.01, \*\*\**p* < 0.001). **(C)** Luciferase reporter assays following transient transfection of MCF10A breast cells. A PRE1 containing the protective (Prot.) or risk allele of rs61938093 and a PRE2 containing the protective (Prot.) or risk allele of rs1735907 were cloned into pGL3-promoter luciferase constructs. Error bars, SEM (n=3). *P*-values were determined by two-way ANOVA followed by Dunnett's multiple comparisons test (\*\*\*\**p* < 0.0001).

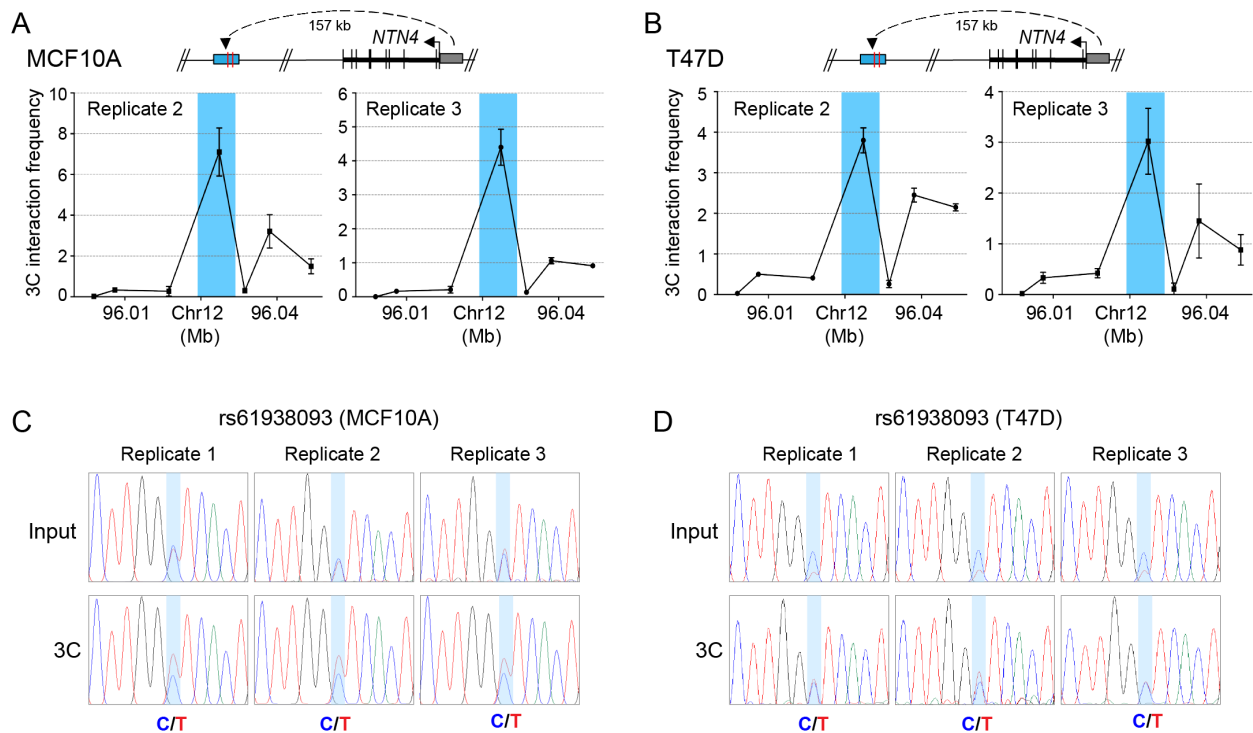

**Figure S4. Allele-specific 3C.** (A,B) Replicate 3C interaction profiles between the *NTN4* promoter and the genomic region containing the PRE in MCF10A and T47D breast cells. 3C libraries were generated with HindIII, with the anchor point set at the *NTN4* promoter. A physical map of the region interrogated by 3C is shown above, the blue shading represents the position of the putative regulatory element (PRE). Error bars, SD (n=3). (C,D) Sanger sequencing chromatograms of MCF10A and T47D genomic input DNA versus 3C PCR product confirming allele-specific looping at rs61938093 (Primer set 1; Table S2).

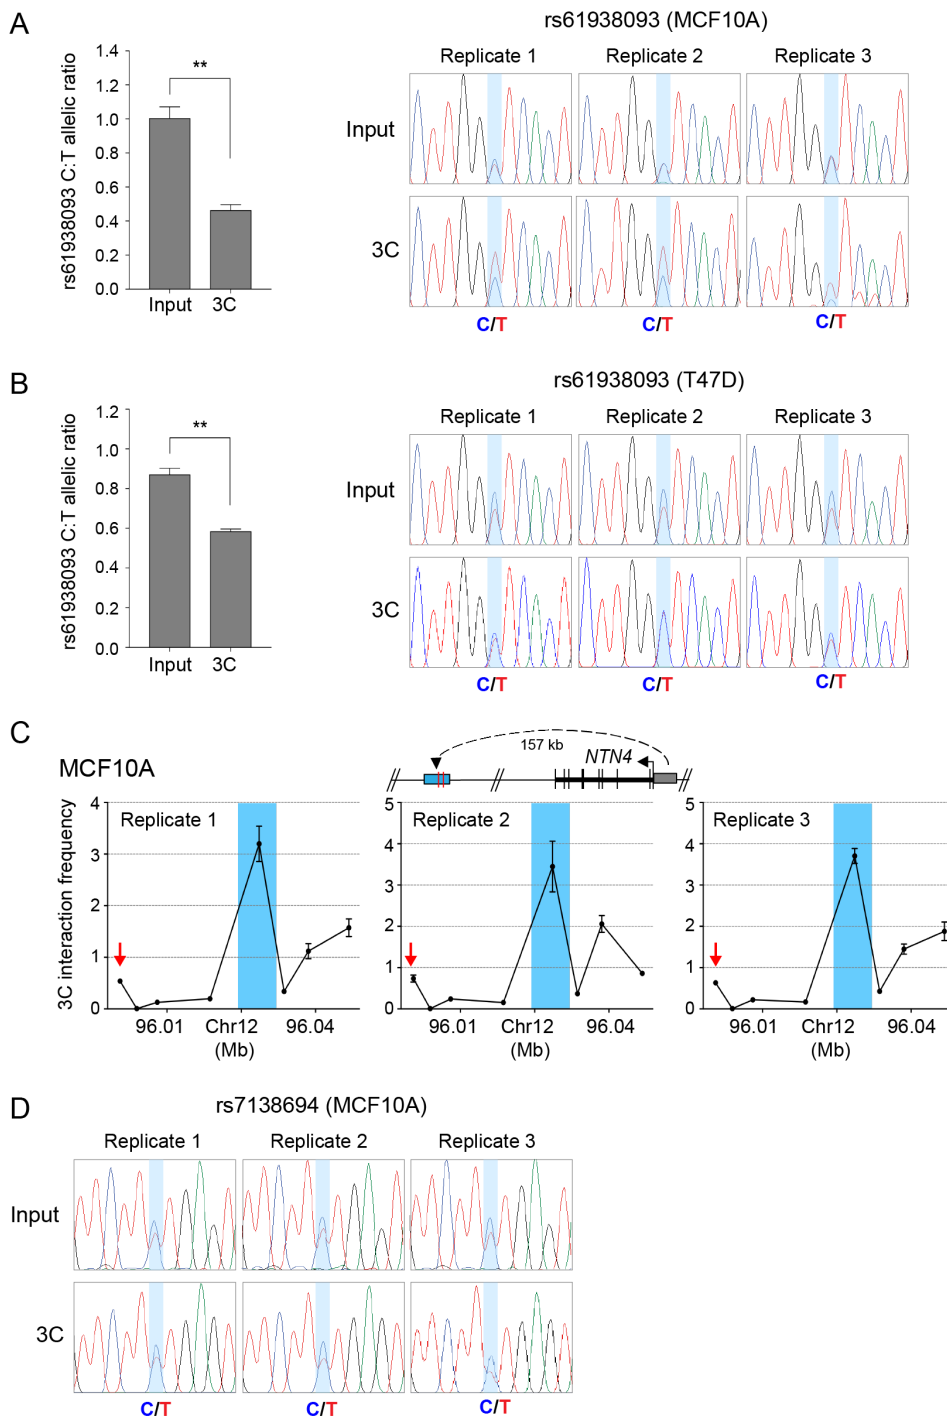

**Figure S5. Allele-specific 3C.** (A,B; left panels) Allele-specific qPCR using primer set 2 (Table S2) and Taqman SNP assay to quantify the allelic ratio at CCV rs61938093 in MCF10A and T47D breast cells. Error bars, SEM (n=3). *P*-values were determined using a Student's *t*-test (\*\**p* < 0.01). (A,B; right panels) Sanger sequencing chromatograms of MCF10A and T47D genomic input DNA versus 3C PCR product confirming allele-specific looping at rs61938093. (C) 3C interaction profiles between the *NTN4* promoter and the genomic region containing the PRE in MCF10A breast cells. 3C libraries were generated with *Hind*III, with the anchor point set at the *NTN4* promoter. A physical map of the region interrogated by 3C is shown above, the blue shading represents the position of the putative regulatory element (PRE). The red arrow shows the *Hind*III fragment assessed by allele-specific 3C as a negative control. Error bars, SD (n=3). (D) Sanger sequencing chromatograms of MCF10A genomic input DNA versus 3C PCR product at rs7138694.



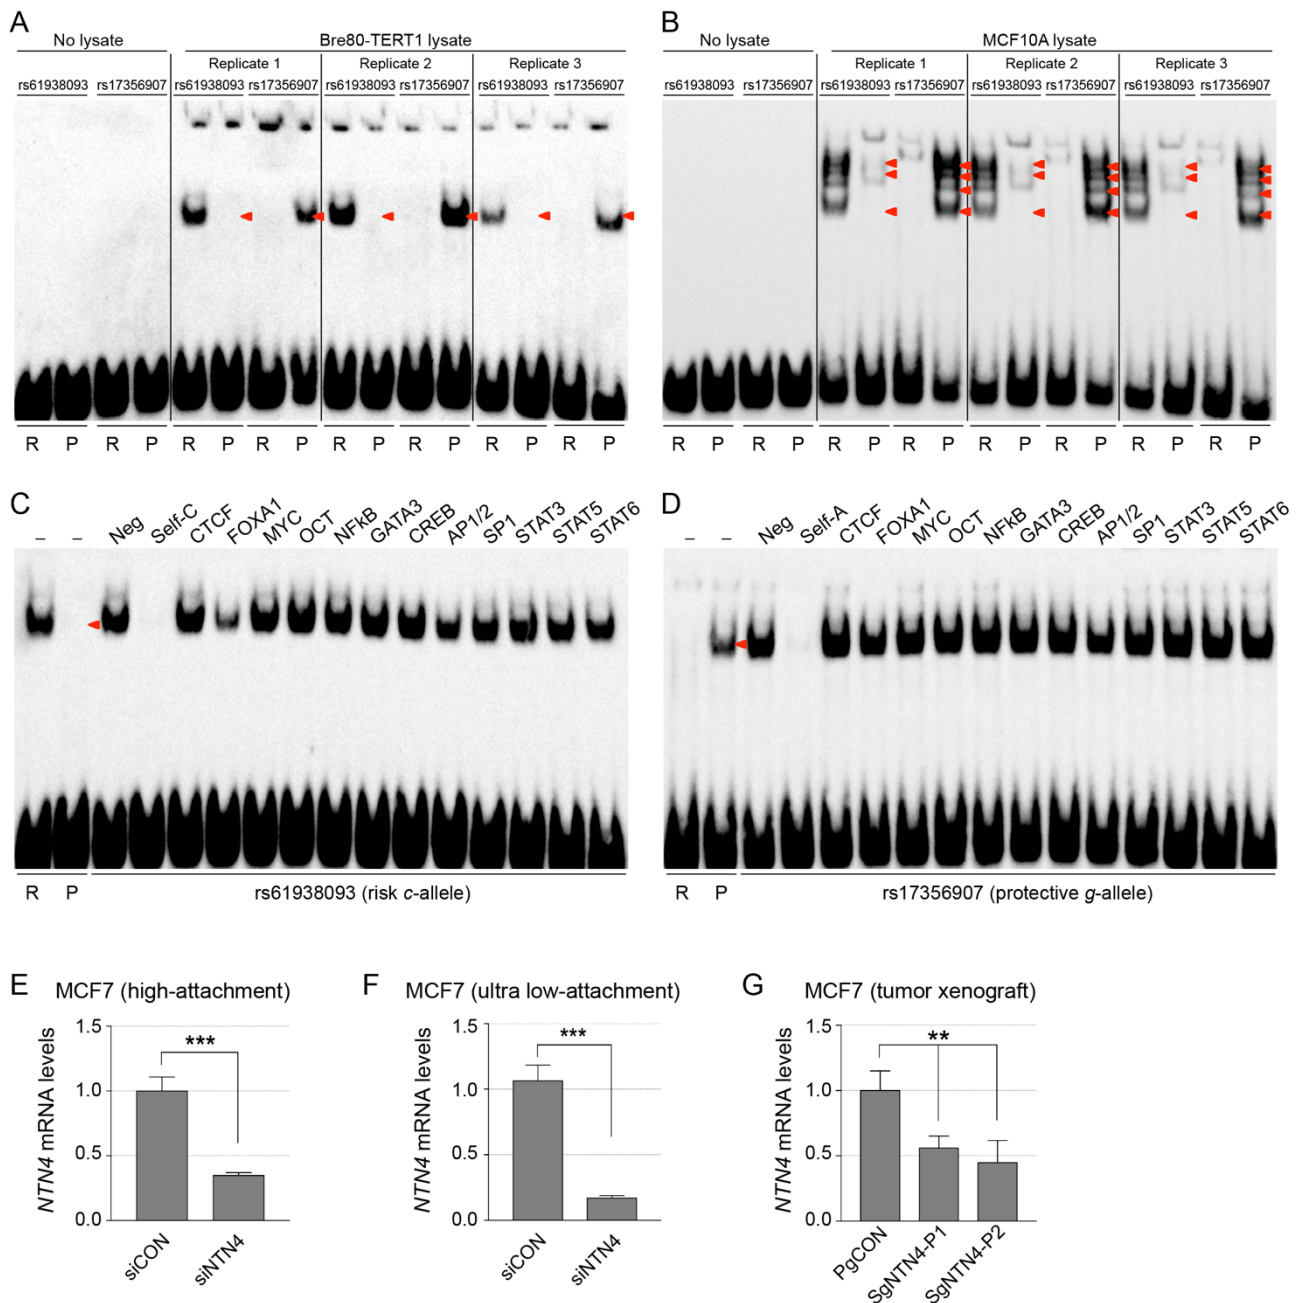

**Figure S6. EMSAs and qPCR validation of *NTN4* depletion.** (A,B) EMSAs for oligonucleotide duplexes containing CCVs rs61938093 or rs17356907 with the risk allele (R) or protective allele (P), assayed using no lysate, Bre80-TERT1 (A) or MCF10A (B) nuclear extracts. Red arrowhead indicates band mobility differences between alleles. (C,D) Competitive EMSAs for oligonucleotide duplexes containing CCVs rs61938093 (C) or rs17356907 (D) with the risk allele (R) or protective allele (P), assayed using Bre80-TERT1 nuclear extracts. Note: the first four lanes of each EMSA are shown in Figure 3F. Competitor oligonucleotides are listed above each panel and were used at 100-fold molar excess: (-) no competitor; (Neg) a non-specific competitor; (Self) an identical oligonucleotide with no biotin label; (transcription factor) consensus binding site. Red arrowheads indicate band mobility differences between alleles. (E, F) *NTN4* depletion after transient transfection of a non-targeting control (siCON) or *NTN4* (siNTN4) siRNAs. *NTN4* levels were measured by qPCR and normalized to *beta-glucuronidase* (*GUSB*). Error bars, SEM (n=3). *P*-values were determined with a student's *t*-test (\*\*\*)*p*<0.001). (G) *NTN4* depletion in MCF7-control (PgCON) or MCF7-dCas9-KRAB *NTN4* depleted cells (SgNTN4-P1/P2). *NTN4* levels were measured by qPCR and normalized to *GUSB*. Error bars, SEM (n=3). *P*-values were determined by one-way ANOVA followed by Dunnetts multiple comparisons test (\*\**p*<0.01).

**Table S1.** Bioinformatic predictions of target genes.

| <b>Gene name</b>    | <b>INQUISIT<sup>3</sup><br/>score</b> | <b>TWAS/eQTL<br/>prediction</b> | <b>References</b> |
|---------------------|---------------------------------------|---------------------------------|-------------------|
| <i>NTN4</i>         | 1                                     | Yes                             | 5                 |
| <i>CBX8</i>         | 2                                     | Yes                             | 5,                |
| <i>L3MBTL3</i>      | 1                                     | Yes                             | 5,6,7,19          |
| <i>MARCH11</i>      | Not applicable                        | Yes                             | 5                 |
| <i>PIDD1</i>        | 1                                     | Yes                             | 5,7               |
| <i>RCCD1</i>        | 1                                     | Yes                             | 5,7               |
| <i>SSBP4</i>        | 2                                     | Yes                             | 5,7               |
| <i>ZNF596</i>       | Not applicable                        | No                              | Not applicable    |
| <i>PRC1-AS1</i>     | 2                                     | Yes                             | 5                 |
| <i>RP11-53O19.1</i> | 2                                     | Yes                             | 6                 |
| <i>RP5-855D21.3</i> | Not applicable                        | No                              | Not applicable    |
| <i>ATG10</i>        | 2                                     | Yes                             | 5,6,7             |
| <i>CCDC88C</i>      | 2                                     | Yes                             | 5,                |
| <i>PPM1K</i>        | Not applicable                        | Yes                             | 5                 |
| <i>RP11-250B2.3</i> | Not applicable                        | No                              | Not applicable    |
| <i>RP11-250B2.5</i> | Not applicable                        | Yes                             | 18,19             |
| <i>RP1-265C24.5</i> | Not applicable                        | No                              | Not applicable    |

**Table S2.** Oligonucleotides and genomic coordinates used in this study.**3C assay validation primer sequences**

| Primer name        | Sequence (5' to 3')                 |
|--------------------|-------------------------------------|
| NTN4 promoter bait | CTGTTAGTGGCTGCCAGACTGTAGACACTCTCC   |
| NTN4_Up4F          | GCCAGGCGTAATGTTGTGTTAATGTGG         |
| NTN4_Up3F          | AACTCACGTTTTACTATCTGCTCTTCCTCCCACC  |
| NTN4_Up2F          | GTTCTGCCTCCACCATGTTAATAACCATCTGG    |
| NTN4_Up1R          | GCTAATGTCCAAAGTTTTCTGTGGCACAGTGC    |
| NTN4_EnhR          | TGAGCAAAGACTGAAGGAAATTAGGGGAGAGG    |
| NTN4_Dn1R          | TGTGATAACCAGACTGGATTACTGTGCTCAAGAGG |
| NTN4_Dn2F          | CAAACGGGTGATTTGGAGGATGCACC          |
| NTN4_Dn3R          | CTCCCTGCCTTATTTGTCATGAACTGCAAGC     |

**Allele-specific 3C PCR and sequencing primers**

| Primer name           | Sequence (5' to 3')               |
|-----------------------|-----------------------------------|
| Primer set 1: 3CgDNA1 | AGATACCACATGGGTCACCTTTCTTCCCTCTCC |
| Primer set 1: 3Cprom1 | CTGTTAGTGGCTGCCAGACTGTAGACACTCTCC |
| Primer set 1: 3Cenh1  | GGTGTACGTCCATGGTCTAGTTACTTGGAAGG  |
| Primer set 2: 3CgDNA2 | CTTAGGCCCTTCCCTTGATATTCCCTCTGC    |
| Primer set 2: 3Cprom2 | CCTGTCACAGGTAGAAACCCTGAAGAGACAGC  |
| Primer set 2: 3Cenh2  | TGGGTGGGATGGTGTACGTCCATGG         |
| Sequencing primer     | CCCTAATTTCTTCAGTCTTTGC            |
| Neg primer: 3CgDNA3   | GGGACATAACAACATGACTAGTTTGAACACACC |
| Neg primer: 3Cprom3   | CTGTTAGTGGCTGCCAGACTGTAGACACTCTCC |
| Neg primer: 3Cenh3    | GCCAGGCGTAATGTTGTGTTAATGTGG       |
| Neg sequencing primer | GCGTAATGTTGTGTTAATGTGG            |

**Genomic coordinates for luciferase assay constructs**

| DNA element          | Genomic coordinates (hg19)  |
|----------------------|-----------------------------|
| NTN4 Promoter        | chr12:96,184,432-96,185,576 |
| NTN4 PRE1-rs61938093 | chr12:96,026,561-96,027,570 |
| NTN4 PRE2-rs17356907 | chr12:96,027,565-96,028,547 |

**EMSA oligonucleotide sequences**

| Name                | CCV-allele   | Sequence (5' to 3'); *5'-biotinylated |
|---------------------|--------------|---------------------------------------|
| 5BIONTN4rs6193RiskF | rs61938093-c | *GTGGCACAATCTTGGCTCACTGCAGCCTCCG      |
| 5BIONTN4rs6193RiskR | rs61938093-c | *CGGAGGCTGCAGTGAGCCAAGATTGTGCCAC      |
| 5BIONTN4rs6193ProtF | rs61938093-t | *GTGGCACAATCTTGGTTCCTGCAGCCTCCG       |
| 5BIONTN4rs6193ProtR | rs61938093-t | *CGGAGGCTGCAGTGAACCAAGATTGTGCCAC      |
| 5BIONTN4rs1735RiskF | rs17356907-a | *TGGGGATTAGATGGTACCAAAAATGACAGTGG     |
| 5BIONTN4rs1735RiskR | rs17356907-a | *CCACTGTCATTTTGGTACCATCTAATCCCCA      |
| 5BIONTN4rs1735ProtF | rs17356907-g | *TGGGGATTAGATGGTGCCAAAATGACAGTGG      |
| 5BIONTN4rs1735ProtR | rs17356907-g | *CCACTGTCATTTTGGCACCATCTAATCCCCA      |
| CEBP                |              | TGCAGATTGCGCAATCTGCA                  |
| NRF1                |              | CTGCTAGCCCGCATGCGCGCGCACCTTA          |
| STAT1               |              | CATGTTATGCATATTCCTGTAAGTG             |
| YY1                 |              | CGCTCCCCGGCCATCTTGGCGGCTGGT           |
| CTCF                |              | AAGAAACCGCTAGGGGGCCTACT               |
| FOXA1               |              | CTGGTCTTAAAGGTGTTTACCTTGTCTGAT        |
| MYC                 |              | TCAGACCACGTGGTCCGG                    |

|       |  |                              |
|-------|--|------------------------------|
| OCT   |  | TGTCGAATGCAAATCACTAGAA       |
| NFkB  |  | AGTTGAGGGGACTTTCCCAGGC       |
| GATA3 |  | CACTTGATAACAGAAAAGTGATAACTCT |
| CREB  |  | AGAGATTGCCTGACGTCAGAGAGCTAG  |
| AP1   |  | CGCTTGATGACTCAGCCGGAA        |
| AP2   |  | GATCGAACTGACCGCCCGCGGCCCGT   |
| SP1   |  | ATTCGATCGGGGCGGGGCGAGC       |
| STAT3 |  | GATCCTTCTGGGAATTCCTAGATC     |
| STAT5 |  | AGATTTCTAGGAATTCAATCC        |
| STAT6 |  | GTATTTCCCAGAAAAGGAAC         |

**CRISPRi sgRNA sequences and genomic target coordinates**

| sgRNA name | Genomic coordinates (hg19) | sgRNA spacer sequence (5' to 3') |
|------------|----------------------------|----------------------------------|
| pgCON      | Non-targeting control      | GACCAGGAUGGGCACCACCC             |
| sgEnh1     | chr12:96027762-96027781    | AAAUGACAGUGGUCUCUGC              |
| sgEnh2     | chr12:96027763-96027782    | AGCAGAGACCACUGUCAUUU             |
| sgNTN4-P1  | chr12:96184481-96184500    | AAAAGCGGAGGAGGACGCCC             |
| sgNTN4-P2  | chr12:96184525-96184544    | UCCGUCCCGUCCUUCUCCAC             |
